# Supplementary material
Source: PubMed Central journal article supplement (PMC10583704)

**Note to readers with disabilities:** *EHP* strives to ensure that all journal content is accessible to all readers. However, some figures and Supplemental Material published in *EHP* articles may not conform to [508 standards](#) due to the complexity of the information being presented. If you need assistance accessing journal content, please contact [ehp508@niehs.nih.gov](mailto:ehp508@niehs.nih.gov). Our staff will work with you to assess and meet your accessibility needs within 3 working days.

### **Supplemental Material**

#### **Prenatal Exposure to Multiple Endocrine-Disrupting Chemicals and Childhood BMI Trajectories in the INMA Cohort Study**

Parisa Montazeri, Nuria Güil-Oumrait, Sandra Marquez, Lourdes Cirugeda, Andrea Beneito, Mònica Guxens, Aitana Lertxundi, Maria-Jose Lopez-Espinosa, Loreto Santa-Marina, Jordi Sunyer, Maribel Casas, and Martine Vrijheid

#### **Table of Contents**

**Table S1.** Details regarding laboratories and LOD or LOQ by sampling period for Gipuzkoa subcohort of the INMA birth cohort study.

**Table S2.** Details regarding laboratories and LOD or LOQ by sampling period for Sabadell subcohort of the INMA birth cohort study.

**Table S3.** Details regarding laboratories and LOD or LOQ by sampling period for Valencia subcohort of the INMA birth cohort study.

**Table S4.** Description of the growth trajectory modeling used in the INMA birth cohort study.

**Table S5.** Characteristics of the study population, unimputed and imputed data for the INMA birth cohort study.

**Table S6.** Associations between EDCs and childhood BMI trajectories from single exposure models using multinomial regression models and expressed as relative risk ratios, for the INMA birth cohort study.

**Table S7.** Associations between EDCs and childhood BMI trajectories from single exposure models using multinomial regression models and expressed as relative risk ratios for the INMA birth cohort study, complete case analysis.

**Table S8.** Associations between EDCs and childhood BMI trajectories from single exposure models using multinomial regression models and expressed as relative risk ratios for the INMA birth cohort study, by sex [females (n = 927) / males (n = 984)].

**Table S9.** Associations between EDCs and childhood BMI growth trajectory classes from single exposure models for the INMA birth cohort study by socioeconomic status, high (n = 613) / middle (n = 497) / low (n = 777).

**Table S10.** Associations between EDC mixture and childhood BMI trajectories from mixture models using BWQS regression (n = 1,911), for the INMA birth cohort study.

**Table S11.** Class-specific mean predicted trajectory values and their confidence intervals for each BMI trajectory class depicted in Figure 1, by select age groups.

**Figure S1.** Directed acyclic graph of the association between prenatal exposure to EDCs and zBMI growth trajectories.

**Figure S2-3.** Pairwise Correlations of EDC exposures for the INMA birth cohort study.

Table S1: Details regarding laboratories and LOD or LOQ by sampling period for Gipuzkoa subcohort of the INMA birth cohort study

| EDC                        |              | 1 <sup>st</sup> trimester only |     |             | 3 <sup>rd</sup> trimester only |             | Pooled (1 <sup>st</sup> + 3 <sup>rd</sup> ) |             |
|----------------------------|--------------|--------------------------------|-----|-------------|--------------------------------|-------------|---------------------------------------------|-------------|
|                            | Lab          | LOD/Q                          | N   | %<br><LOD/Q | N                              | %<br><LOD/Q | N                                           | %<br><LOD/Q |
| Phthalates:                |              |                                |     |             |                                |             |                                             |             |
| MEP                        | NIPH         | 0.15                           | 20  | 0%          | 5                              | 0%          | 229                                         | 0%          |
| MiBP                       | NIPH         | 0.15                           | 20  | 0%          | 5                              | 0%          | 229                                         | 0%          |
| MnBP                       | NIPH         | 0.15                           | 20  | 0%          | 5                              | 0%          | 229                                         | 0%          |
| MBzP                       | NIPH         | 0.06                           | 20  | 0%          | 5                              | 0%          | 228                                         | 0%          |
| MEHP                       | NIPH         | 0.15                           | 20  | 0%          | 5                              | 0%          | 228                                         | 0%          |
| MEHHP                      | NIPH         | 0.12                           | 20  | 0%          | 5                              | 0%          | 229                                         | 0%          |
| MEOHP                      | NIPH         | 0.12                           | 20  | 0%          | 5                              | 0%          | 229                                         | 0%          |
| MECPP                      | NIPH         | 0.61                           | 20  | 0%          | 5                              | 0%          | 229                                         | 0%          |
| Phenols:                   |              |                                |     |             |                                |             |                                             |             |
| MEPA                       | Granada      | 0.06                           | 20  | 0%          | 6                              | 0%          | 229                                         | 0%          |
| ETPA                       | Granada      | 0.06                           | 20  | 0%          | 6                              | 0%          | 229                                         | 1.3%        |
| PRPA                       | Granada      | 0.06                           | 20  | 0%          | 6                              | 0%          | 229                                         | 0%          |
| BPA                        | Granada      | 0.12                           | 20  | 20.0%       | 6                              | 0%          | 229                                         | 19.7%       |
| BUPA                       | Granada      | 0.04                           | 20  | 25.0%       | 6                              | 0%          | 229                                         | 10.0%       |
| BP-3                       | Granada      | 0.07                           | 20  | 5.0%        | 6                              | 0%          | 229                                         | 3.1%        |
| TRCS                       | not measured |                                |     |             |                                |             |                                             |             |
| Organochlorine compounds:  |              |                                |     |             |                                |             |                                             |             |
| HCB                        | Gipuzkoa     | 0.071                          | 549 | 9.3%        |                                |             |                                             |             |
| DDE                        | Gipuzkoa     | 0.071                          | 549 | 2.2%        |                                |             |                                             |             |
| PFHxS                      | RWTH         | 0.2                            | 324 | 7.4%        |                                |             |                                             |             |
| PFOA                       | RWTH         | 0.2                            | 324 | 0%          |                                |             |                                             |             |
| PFOS                       | RWTH         | 0.2                            | 324 | 0%          |                                |             |                                             |             |
| PFNA                       | RWTH         | 0.1                            | 324 | 0.3%        |                                |             |                                             |             |
| Perfluoroalkyl substances: |              |                                |     |             |                                |             |                                             |             |
| PCB 138                    | Gipuzkoa     | 0.071                          | 548 | 6.8%        |                                |             |                                             |             |
| PCB 153                    | Gipuzkoa     | 0.071                          | 548 | 2.2%        |                                |             |                                             |             |
| PCB 180                    | Gipuzkoa     | 0.071                          | 549 | 3.6%        |                                |             |                                             |             |

Abbreviation: EDC = endocrine disrupting chemical, LOD/Q = limit of detection/quantification, N = number of observations, NIPH = Norwegian Institute of Public Health, RWTH = Rheinisch-Westfälische Technische Hochschule Aachen University

Table S2: Details regarding laboratories and LOD or LOQ by sampling period for Sabadell subcohort of the INMA birth cohort study

| EDC                                                                                                                                                                                                                                                                                             |          | 1 <sup>st</sup> trimester only |     |             | 3 <sup>rd</sup> trimester only |             | Pooled (1 <sup>st</sup> + 3 <sup>rd</sup> ) |             |
|-------------------------------------------------------------------------------------------------------------------------------------------------------------------------------------------------------------------------------------------------------------------------------------------------|----------|--------------------------------|-----|-------------|--------------------------------|-------------|---------------------------------------------|-------------|
|                                                                                                                                                                                                                                                                                                 | Lab      | LOD/Q                          | N   | %<br><LOD/Q | N                              | %<br><LOD/Q | N                                           | %<br><LOD/Q |
| Phthalates:                                                                                                                                                                                                                                                                                     |          |                                |     |             |                                |             |                                             |             |
| MEP                                                                                                                                                                                                                                                                                             | IMIM     | 1                              | 395 | 0%          | 403                            | 0.2%        |                                             |             |
| MiBP                                                                                                                                                                                                                                                                                            | IMIM     | 0.5                            | 395 | 0%          | 403                            | 0%          |                                             |             |
| MnBP                                                                                                                                                                                                                                                                                            | IMIM     | 1                              | 395 | 0.8%        | 403                            | 0.5%        |                                             |             |
| MBzP                                                                                                                                                                                                                                                                                            | IMIM     | 0.5                            | 395 | 0.8%        | 403                            | 0.7%        |                                             |             |
| MEHP                                                                                                                                                                                                                                                                                            | IMIM     | 1                              | 395 | 0.5%        | 403                            | 0.5%        |                                             |             |
| MEHHP                                                                                                                                                                                                                                                                                           | IMIM     | 0.5                            | 395 | 0%          | 403                            | 0%          |                                             |             |
| MEOHP                                                                                                                                                                                                                                                                                           | IMIM     | 0.5                            | 395 | 0%          | 403                            | 0%          |                                             |             |
| MECPP                                                                                                                                                                                                                                                                                           | IMIM     | 1                              | 395 | 0%          | 403                            | 0.2%        |                                             |             |
| Phenols:                                                                                                                                                                                                                                                                                        |          |                                |     |             |                                |             |                                             |             |
| MEPA                                                                                                                                                                                                                                                                                            | NIPH     | 0.03                           | 99  | 0%          | 456                            | 0%          |                                             |             |
| ETPA                                                                                                                                                                                                                                                                                            | NIPH     | 0.03                           | 99  | 0%          | 456                            | 0.7%        |                                             |             |
| PRPA                                                                                                                                                                                                                                                                                            | NIPH     | 0.03                           | 99  | 1.0%        | 454                            | 0.2%        |                                             |             |
| BPA                                                                                                                                                                                                                                                                                             | NIPH     | 0.03                           | 99  | 0%          | 455                            | 0.9%        |                                             |             |
| BUPA                                                                                                                                                                                                                                                                                            | NIPH     | 0.06                           | 99  | 5.1%        | 454                            | 5.1%        |                                             |             |
| BP-3                                                                                                                                                                                                                                                                                            | NIPH     | 0.03                           | 99  | 0.0%        | 456                            | 0%          |                                             |             |
| TRCS                                                                                                                                                                                                                                                                                            | NIPH     | 0.03                           | 99  | 0.0%        | 456                            | 0%          |                                             |             |
| Organochlorine compounds:                                                                                                                                                                                                                                                                       |          |                                |     |             |                                |             |                                             |             |
| HCB                                                                                                                                                                                                                                                                                             | Gipuzkoa | 0.071                          | 548 | 8.4%        |                                |             |                                             |             |
| DDE                                                                                                                                                                                                                                                                                             | Gipuzkoa | 0.071                          | 548 | 0.2%        |                                |             |                                             |             |
| PFHxS                                                                                                                                                                                                                                                                                           | RWTH     | 0.2                            | 407 | 2.2%        |                                |             |                                             |             |
| PFOA                                                                                                                                                                                                                                                                                            | RWTH     | 0.2                            | 407 | 0%          |                                |             |                                             |             |
| PFOS                                                                                                                                                                                                                                                                                            | RWTH     | 0.2                            | 407 | 0%          |                                |             |                                             |             |
| PFNA                                                                                                                                                                                                                                                                                            | RWTH     | 0.1                            | 407 | 0.7%        |                                |             |                                             |             |
| Perfluoroalkyl substances:                                                                                                                                                                                                                                                                      |          |                                |     |             |                                |             |                                             |             |
| PCB 138                                                                                                                                                                                                                                                                                         | Gipuzkoa | 0.071                          | 548 | 22.1%       |                                |             |                                             |             |
| PCB 153                                                                                                                                                                                                                                                                                         | Gipuzkoa | 0.071                          | 548 | 7.8%        |                                |             |                                             |             |
| PCB 180                                                                                                                                                                                                                                                                                         | Gipuzkoa | 0.071                          | 548 | 16.6%       |                                |             |                                             |             |
| Abbreviation: EDC = endocrine disrupting chemical, IMIM = Hospital de Mar Medical Research Institute, LOD/Q = limit of detection/quantification, N = number of observations, NIPH = Norwegian Institute of Public Health, RWTH = Rheinisch-Westfälische Technische Hochschule Aachen University |          |                                |     |             |                                |             |                                             |             |

Table S3: Details regarding laboratories and LOD or LOQ by sampling period for Valencia subcohort of the INMA birth cohort study

| EDC                        |      | 1 <sup>st</sup> trimester only |     |             | 3 <sup>rd</sup> trimester only |             | Pooled (1 <sup>st</sup> + 3 <sup>rd</sup> ) |             |
|----------------------------|------|--------------------------------|-----|-------------|--------------------------------|-------------|---------------------------------------------|-------------|
|                            | Lab  | LOD/Q                          | N   | %<br><LOD/Q | N                              | %<br><LOD/Q | N                                           | %<br><LOD/Q |
| Phthalates:                |      |                                |     |             |                                |             |                                             |             |
| MEP                        | NIPH | 0.15                           | 6   | 0%          | 45                             | 0%          | 270                                         | 0%          |
| MiBP                       | NIPH | 0.15                           | 6   | 0%          | 45                             | 0%          | 270                                         | 0%          |
| MnBP                       | NIPH | 0.15                           | 6   | 0%          | 45                             | 0%          | 270                                         | 0%          |
| MBzP                       | NIPH | 0.06                           | 6   | 0%          | 45                             | 0%          | 270                                         | 0%          |
| MEHP                       | NIPH | 0.15                           | 6   | 0%          | 44                             | 0%          | 270                                         | 0%          |
| MEHHP                      | NIPH | 0.12                           | 6   | 0%          | 45                             | 0%          | 270                                         | 0%          |
| MEOHP                      | NIPH | 0.12                           | 6   | 0%          | 45                             | 0%          | 270                                         | 0%          |
| MECPP                      | NIPH | 0.61                           | 6   | 0%          | 45                             | 0%          | 270                                         | 0%          |
| Phenols:                   |      |                                |     |             |                                |             |                                             |             |
| MEPA                       | NIPH | 0.03                           | 437 | 0%          | 437                            | 0%          |                                             |             |
| ETPA                       | NIPH | 0.03                           | 437 | 0%          | 437                            | 0%          |                                             |             |
| PRPA                       | NIPH | 0.03                           | 437 | 1.1%        | 437                            | 0.5%        |                                             |             |
| BPA                        | NIPH | 0.03                           | 437 | 0%          | 437                            | 0%          |                                             |             |
| BUPA                       | NIPH | 0.07                           | 437 | 10.3%       | 437                            | 11.0%       |                                             |             |
| BP-3                       | NIPH | 0.03                           | 437 | 0%          | 437                            | 0%          |                                             |             |
| TRCS                       | NIPH | 0.07                           | 437 | 0%          | 437                            | 0%          |                                             |             |
| Organochlorine compounds:  |      |                                |     |             |                                |             |                                             |             |
| HCB                        | CSIC | 0.029                          | 598 | 5.5%        |                                |             |                                             |             |
| DDE                        | CSIC | 0.015                          | 598 | 0.3%        |                                |             |                                             |             |
| PFHxS                      | RWTH | 0.2                            | 505 | 2.6%        |                                |             |                                             |             |
| PFOA                       | RWTH | 0.2                            | 505 | 0%          |                                |             |                                             |             |
| PFOS                       | RWTH | 0.2                            | 505 | 0%          |                                |             |                                             |             |
| PFNA                       | RWTH | 0.1                            | 505 | 0.8%        |                                |             |                                             |             |
| Perfluoroalkyl substances: |      |                                |     |             |                                |             |                                             |             |
| PCB 138                    | CSIC | 0.028                          | 598 | 4.0%        |                                |             |                                             |             |
| PCB 153                    | CSIC | 0.017                          | 598 | 3.8%        |                                |             |                                             |             |
| PCB 180                    | CSIC | 0.015                          | 598 | 2.8%        |                                |             |                                             |             |

Abbreviation: CSIC = Superior Council of Scientific Investigations, EDC = endocrine disrupting chemical, LOD/Q = limit of detection/quantification, N = number of observations, NIPH = Norwegian Institute of Public Health, RWTH = Rheinisch-Westfälische Technische Hochschule Aachen University

Table S4. Description of the growth trajectory modeling used in the INMA birth cohort study

**Software used:** RStudio 4.0.3 (RStudio Team (2020). RStudio: Integrated Development for R. RStudio, PBC, Boston, MA URL <http://www.rstudio.com/>.)

**Package used:** *lcmm*: Extended Mixed Models Using Latent Classes and Latent Processes

**Objective:** Find the different growth patterns using only the age of each measurement as a predictor.

**Model parameters:**

```
lcmm(fixed = zBMI ~ bs(age, df = 3), mixture = ~bs(age,  
      df = 3), subject = "id", ng = g, link = "linear", data = x)
```

Statistical Model:

Number of latent classes: 5

Goodness-of-fit statistics:

AIC: 66732.94

BIC: 66876.93

| Table S5. Characteristics of the study population, unimputed and imputed data for the INMA birth cohort study |         |                    |                |
|---------------------------------------------------------------------------------------------------------------|---------|--------------------|----------------|
| Characteristic                                                                                                | Missing | Unimputed Data     | Imputed Data   |
|                                                                                                               | (N)     | N (%) or Mean (SD) | % or Mean (SD) |
| Sub-cohort                                                                                                    | 0       |                    |                |
| Gipuzkoa                                                                                                      |         | 556 (29.1)         | -              |
| Sabadell                                                                                                      |         | 659 (34.5)         | -              |
| Valencia                                                                                                      |         | 696 (36.4)         | -              |
| Social Class                                                                                                  | 94      |                    |                |
| High                                                                                                          |         | 594 (32.7)         | 32.6           |
| Middle                                                                                                        |         | 477 (26.2)         | 26.3           |
| Low                                                                                                           |         | 746 (41.1)         | 41.2           |
| Smoking during pregnancy                                                                                      | 33      |                    |                |
| None                                                                                                          |         | 1293 (68.9)        | 68.9           |
| Yes                                                                                                           |         | 585 (31.1)         | 31.1           |
| Parity                                                                                                        | 96      |                    |                |
| 0                                                                                                             |         | 1012 (55.8)        | 55.4           |
| 1+                                                                                                            |         | 803 (44.2)         | 44.6           |
| Maternal age (at delivery)                                                                                    | 2       | 31.8 (4.2)         | 31.8 (4.2)     |
| Maternal prepregnancy BMI                                                                                     | 17      | 23.5 (4.2)         | 23.5 (4.3)     |
| Paternal BMI (pregnancy)                                                                                      | 112     | 25.8 (3.4)         | 25.8 (3.4)     |
| Maternal Mediterranean diet score                                                                             | 94      | 8.0 (2.7)          | 8.0 (2.7)      |
| Child sex                                                                                                     | 0       |                    |                |
| Females                                                                                                       |         | 927 (48.5)         | -              |
| Males                                                                                                         |         | 984 (51.5)         | -              |
| Abbreviations: N = number of observations, SD = standard deviation, BMI = body mass index                     |         |                    |                |

Table S6. Associations between EDCs and childhood BMI trajectories from single exposure models using multinomial regression models and expressed as relative risk ratios, for the INMA birth cohort study.

|                   | Class 1<br>Higher birth size –<br>accelerated BMI gain | Class 2<br>Higher birth size –<br>slower BMI gain | Class 3<br>Lower birth size –<br>accelerated BMI gain | Class 5<br>Lower birth size –<br>slower BMI gain |
|-------------------|--------------------------------------------------------|---------------------------------------------------|-------------------------------------------------------|--------------------------------------------------|
|                   | N = 212                                                | N = 513                                           | N = 292                                               | N = 287                                          |
| EDC               | RRR (95% CI)                                           | RRR (95% CI)                                      | RRR (95% CI)                                          | RRR (95% CI)                                     |
| MEP               | 1.05 (0.91, 1.20)                                      | 1.01 (0.92, 1.11)                                 | 0.99 (0.89, 1.11)                                     | 1.02 (0.91, 1.15)                                |
| MiBP              | 1.05 (0.84, 1.30)                                      | 1.02 (0.87, 1.19)                                 | 0.96 (0.80, 1.15)                                     | 0.98 (0.82, 1.17)                                |
| MnBP              | 1.00 (0.84, 1.20)                                      | 0.94 (0.83, 1.07)                                 | 0.96 (0.82, 1.12)                                     | 0.95 (0.82, 1.10)                                |
| MBzP              | 1.04 (0.86, 1.25)                                      | 1.04 (0.91, 1.19)                                 | 1.11 (0.94, 1.30)                                     | 1.00 (0.86, 1.17)                                |
| MEHP              | 1.08 (0.89, 1.33)                                      | 1.06 (0.93, 1.21)                                 | 1.08 (0.92, 1.27)                                     | 1.08 (0.92, 1.26)                                |
| MEHHP             | 1.13 (0.93, 1.37)                                      | 1.13 (0.97, 1.31)                                 | 1.08 (0.91, 1.29)                                     | 1.07 (0.90, 1.27)                                |
| MEOHP             | 1.14 (0.93, 1.39)                                      | 1.12 (0.96, 1.31)                                 | 1.08 (0.91, 1.29)                                     | 1.05 (0.89, 1.25)                                |
| MECPP             | 1.07 (0.86, 1.33)                                      | 1.07 (0.91, 1.27)                                 | 1.00 (0.83, 1.21)                                     | 1.03 (0.86, 1.24)                                |
| MEPA              | 0.98 (0.90, 1.07)                                      | 1.00 (0.93, 1.07)                                 | 0.99 (0.92, 1.07)                                     | 0.97 (0.90, 1.06)                                |
| ETPA              | 0.99 (0.91, 1.07)                                      | 0.98 (0.92, 1.04)                                 | 1.02 (0.95, 1.09)                                     | 1.03 (0.96, 1.10)                                |
| PRPA              | 1.00 (0.93, 1.07)                                      | 1.01 (0.95, 1.08)                                 | 1.02 (0.95, 1.08)                                     | 0.99 (0.93, 1.06)                                |
| BPA               | 1.02 (0.91, 1.14)                                      | 1.03 (0.95, 1.11)                                 | 1.01 (0.93, 1.10)                                     | 1.01 (0.90, 1.12)                                |
| BUPA              | 0.98 (0.92, 1.05)                                      | 1.00 (0.95, 1.06)                                 | 1.02 (0.96, 1.08)                                     | 0.99 (0.93, 1.05)                                |
| BP-3              | 1.00 (0.93, 1.07)                                      | 1.00 (0.95, 1.06)                                 | 1.01 (0.95, 1.08)                                     | 1.05 (0.99, 1.11)                                |
| TRCS <sup>a</sup> | 1.02 (0.93, 1.10)                                      | 1.02 (0.96, 1.09)                                 | 0.98 (0.92, 1.05)                                     | 1.01 (0.94, 1.09)                                |
| HCB               | 1.17 (1.01, 1.36)                                      | 1.06 (0.96, 1.18)                                 | 1.25 (1.09, 1.42)                                     | 1.05 (0.93, 1.19)                                |
| DDE               | 1.15 (1.00, 1.32)                                      | 1.01 (0.91, 1.13)                                 | 1.19 (1.05, 1.35)                                     | 1.01 (0.90, 1.15)                                |
| PFHxS             | 0.77 (0.58, 1.01)                                      | 0.90 (0.75, 1.08)                                 | 1.14 (0.92, 1.43)                                     | 1.05 (0.84, 1.30)                                |
| PFOA              | 1.01 (0.76, 1.33)                                      | 1.02 (0.84, 1.24)                                 | 1.16 (0.92, 1.48)                                     | 1.05 (0.84, 1.33)                                |
| PFOS              | 0.93 (0.68, 1.26)                                      | 1.02 (0.81, 1.28)                                 | 1.25 (0.97, 1.61)                                     | 1.02 (0.80, 1.29)                                |
| PFNA              | 1.01 (0.76, 1.33)                                      | 1.11 (0.90, 1.36)                                 | 1.32 (1.05, 1.66)                                     | 1.08 (0.85, 1.36)                                |
| PCB 138           | 1.06 (0.89, 1.27)                                      | 1.05 (0.92, 1.20)                                 | 1.24 (1.05, 1.46)                                     | 1.07 (0.91, 1.24)                                |
| PCB 153           | 1.02 (0.85, 1.21)                                      | 0.98 (0.86, 1.12)                                 | 1.25 (1.05, 1.48)                                     | 1.01 (0.87, 1.17)                                |
| PCB 180           | 0.99 (0.82, 1.19)                                      | 1.03 (0.89, 1.19)                                 | 1.20 (1.01, 1.43)                                     | 1.06 (0.91, 1.25)                                |

Reference outcome category is Class 4: average birth size and subsequent slower BMI gain (N = 607)

Using imputed data (m=20)

Abbreviations: BMI = body mass index, RRR = relative risk ratio, CI = confidence interval

<sup>a</sup> TRCS only included two cohorts (Sabadell, Valencia) as such sample size was smaller (n = 1,355)

All models adjusted for sub-cohort, social class, smoking during pregnancy, parity, maternal age at delivery, maternal prepregnancy BMI, paternal prepregnancy BMI, maternal Mediterranean diet score, child sex.



Table S7. Associations between EDCs and childhood BMI trajectories from single exposure models using multinomial regression models and expressed as relative risk ratios for the INMA birth cohort study, complete case analysis.

| EDC               | N    | Class 1                                  | Class 2                             | Class 3                                 | Class 5                            |
|-------------------|------|------------------------------------------|-------------------------------------|-----------------------------------------|------------------------------------|
|                   |      | Higher birth size – accelerated BMI gain | Higher birth size – slower BMI gain | Lower birth size – accelerated BMI gain | Lower birth size – slower BMI gain |
|                   |      | RRR (95% CI)                             | RRR (95% CI)                        | RRR (95% CI)                            | RRR (95% CI)                       |
| MEP               | 958  | 1.10 (0.94, 1.28)                        | 1.01 (0.90, 1.13)                   | 0.95 (0.83, 1.08)                       | 0.99 (0.85, 1.14)                  |
| MiBP              | 958  | 1.09 (0.87, 1.36)                        | 0.99 (0.83, 1.17)                   | 0.96 (0.79, 1.16)                       | 0.96 (0.79, 1.18)                  |
| MnBP              | 958  | 1.03 (0.87, 1.22)                        | 0.89 (0.77, 1.02)                   | 0.94 (0.81, 1.09)                       | 0.91 (0.78, 1.07)                  |
| MBzP              | 957  | 1.05 (0.85, 1.28)                        | 0.99 (0.85, 1.16)                   | 1.19 (1.00, 1.40)                       | 0.93 (0.78, 1.12)                  |
| MEHP              | 956  | 1.17 (0.94, 1.45)                        | 1.05 (0.89, 1.24)                   | 1.20 (1.00, 1.44)                       | 1.02 (0.83, 1.25)                  |
| MEHHP             | 958  | 1.19 (0.95, 1.50)                        | 1.13 (0.95, 1.35)                   | 1.18 (0.97, 1.43)                       | 0.98 (0.79, 1.23)                  |
| MEOHP             | 958  | 1.21 (0.95, 1.54)                        | 1.13 (0.94, 1.36)                   | 1.20 (0.98, 1.47)                       | 0.97 (0.77, 1.22)                  |
| MECPP             | 958  | 1.10 (0.85, 1.42)                        | 1.06 (0.88, 1.29)                   | 1.04 (0.83, 1.29)                       | 0.93 (0.73, 1.19)                  |
| MEPA              | 1121 | 0.98 (0.89, 1.08)                        | 1.00 (0.93, 1.07)                   | 0.99 (0.92, 1.08)                       | 0.97 (0.89, 1.06)                  |
| ETPA              | 1121 | 1.01 (0.93, 1.10)                        | 0.98 (0.92, 1.05)                   | 1.03 (0.95, 1.10)                       | 1.05 (0.97, 1.13)                  |
| PRPA              | 1119 | 1.01 (0.93, 1.09)                        | 1.02 (0.96, 1.09)                   | 1.03 (0.96, 1.11)                       | 1.01 (0.94, 1.09)                  |
| BPA               | 1120 | 1.03 (0.92, 1.15)                        | 1.04 (0.96, 1.12)                   | 1.00 (0.91, 1.09)                       | 0.98 (0.88, 1.08)                  |
| BUPA              | 1119 | 0.98 (0.91, 1.06)                        | 1.00 (0.95, 1.06)                   | 1.04 (0.97, 1.11)                       | 0.98 (0.92, 1.05)                  |
| BP-3              | 1121 | 1.01 (0.94, 1.08)                        | 1.01 (0.96, 1.06)                   | 1.02 (0.96, 1.09)                       | 1.05 (0.98, 1.11)                  |
| TRCS <sup>a</sup> | 880  | 1.02 (0.93, 1.11)                        | 1.03 (0.97, 1.10)                   | 0.99 (0.91, 1.06)                       | 1.03 (0.95, 1.11)                  |
| HCB               | 1649 | 1.19 (1.03, 1.39)                        | 1.05 (0.95, 1.17)                   | 1.24 (1.08, 1.41)                       | 1.04 (0.92, 1.17)                  |
| DDE               | 1649 | 1.19 (1.03, 1.37)                        | 1.01 (0.90, 1.12)                   | 1.24 (1.09, 1.40)                       | 1.06 (0.93, 1.20)                  |
| PFHxS             | 1205 | 0.82 (0.62, 1.08)                        | 0.96 (0.77, 1.18)                   | 1.27 (0.99, 1.64)                       | 1.01 (0.79, 1.30)                  |
| PFOA              | 1205 | 1.18 (0.88, 1.59)                        | 1.10 (0.88, 1.37)                   | 1.29 (1.00, 1.65)                       | 1.09 (0.84, 1.42)                  |
| PFOS              | 1205 | 0.98 (0.73, 1.33)                        | 1.09 (0.87, 1.38)                   | 1.33 (1.02, 1.74)                       | 1.05 (0.80, 1.37)                  |
| PFNA              | 1205 | 1.08 (0.82, 1.43)                        | 1.22 (0.98, 1.52)                   | 1.50 (1.17, 1.92)                       | 1.11 (0.86, 1.43)                  |
| PCB 138           | 1648 | 1.06 (0.88, 1.27)                        | 1.05 (0.92, 1.21)                   | 1.24 (1.05, 1.47)                       | 1.06 (0.91, 1.25)                  |
| PCB 153           | 1648 | 1.02 (0.85, 1.22)                        | 0.98 (0.86, 1.12)                   | 1.24 (1.04, 1.48)                       | 1.00 (0.86, 1.16)                  |
| PCB 180           | 1649 | 0.99 (0.82, 1.19)                        | 1.03 (0.90, 1.19)                   | 1.20 (1.00, 1.43)                       | 1.04 (0.88, 1.23)                  |

Reference outcome category is Class 4: average birth size and subsequent slower BMI gain

Abbreviations: BMI = body mass index, RRR = relative risk ratio, CI = confidence interval

<sup>a</sup> TRCS only included two cohorts (Sabadell, Valencia) as such sample size was smaller (n = 1,355)

All models adjusted for sub-cohort, social class, smoking during pregnancy, parity, maternal age at delivery, maternal prepregnancy BMI, paternal prepregnancy BMI, maternal Mediterranean diet score, child sex.

Table S8. Associations between EDCs and childhood BMI trajectories from single exposure models using multinomial regression models and expressed as relative risk ratios for the INMA birth cohort study, by sex [females (n = 927) / males (n = 984)]

|                   |         | Class 1<br>Higher birth size<br>– accelerated BMI<br>gain | Class 2<br>Higher birth size<br>– slower BMI<br>gain | Class 3<br>Lower birth size –<br>accelerated BMI<br>gain | Class 5<br>Lower birth size –<br>slower BMI<br>gain |
|-------------------|---------|-----------------------------------------------------------|------------------------------------------------------|----------------------------------------------------------|-----------------------------------------------------|
| Sex               |         |                                                           |                                                      |                                                          |                                                     |
| Females           |         | N = 85 (40.1%)                                            | N = 242 (47.2%)                                      | N = 143 (49%)                                            | N = 131 (45.6%)                                     |
| Males             |         | N = 127 (59.9%)                                           | N = 271 (52.8%)                                      | N = 149 (51%)                                            | N = 156 (54.4%)                                     |
| EDC               |         | RRR (95% CI)                                              | RRR (95% CI)                                         | RRR (95% CI)                                             | RRR (95% CI)                                        |
| MEP               | Females | 1.03 (0.83, 1.29)                                         | 1.01 (0.89, 1.15)                                    | 1.02 (0.87, 1.19)                                        | 1.05 (0.88, 1.25)                                   |
|                   | Males   | 1.06 (0.90, 1.25)                                         | 1.02 (0.88, 1.17)                                    | 0.97 (0.83, 1.13)                                        | 0.99 (0.84, 1.18)                                   |
| MiBP              | Females | 1.02 (0.75, 1.39)                                         | 1.06 (0.84, 1.34)                                    | 0.95 (0.74, 1.21)                                        | 0.97 (0.76, 1.25)                                   |
|                   | Males   | 1.08 (0.82, 1.43)                                         | 0.99 (0.80, 1.22)                                    | 0.98 (0.77, 1.25)                                        | 0.99 (0.76, 1.28)                                   |
| MnBP              | Females | 1.04 (0.79, 1.36)                                         | 0.91 (0.76, 1.09)                                    | 0.95 (0.78, 1.15)                                        | 0.94 (0.77, 1.14)                                   |
|                   | Males   | 0.98 (0.79, 1.22)                                         | 0.97 (0.82, 1.15)                                    | 0.97 (0.79, 1.18)                                        | 0.96 (0.78, 1.19)                                   |
| MBzP              | Females | 1.11 (0.83, 1.47)                                         | 1.07 (0.87, 1.32)                                    | 1.11 (0.89, 1.40)                                        | 0.95 (0.76, 1.18)                                   |
|                   | Males   | 1.00 (0.79, 1.25)                                         | 1.01 (0.85, 1.21)                                    | 1.10 (0.90, 1.35)                                        | 1.04 (0.82, 1.31)                                   |
| MEHP              | Females | 1.17 (0.89, 1.54)                                         | 1.11 (0.93, 1.34)                                    | 1.15 (0.93, 1.43)                                        | 1.10 (0.88, 1.37)                                   |
|                   | Males   | 1.02 (0.79, 1.33)                                         | 1.02 (0.82, 1.26)                                    | 1.02 (0.81, 1.29)                                        | 1.06 (0.85, 1.31)                                   |
| MEHHP             | Females | 1.29 (0.96, 1.73)                                         | <b>1.23 (1.01, 1.51)</b>                             | 1.21 (0.95, 1.52)                                        | 1.13 (0.88, 1.46)                                   |
|                   | Males   | 1.01 (0.77, 1.31)                                         | 1.03 (0.82, 1.29)                                    | 0.96 (0.73, 1.25)                                        | 1.01 (0.8, 1.27)                                    |
| MEOHP             | Females | 1.26 (0.95, 1.68)                                         | 1.21 (0.99, 1.48)                                    | 1.20 (0.95, 1.51)                                        | 1.13 (0.88, 1.46)                                   |
|                   | Males   | 1.03 (0.78, 1.36)                                         | 1.04 (0.82, 1.31)                                    | 0.97 (0.73, 1.28)                                        | 0.98 (0.77, 1.23)                                   |
| MECPP             | Females | 1.14 (0.81, 1.61)                                         | 1.15 (0.92, 1.44)                                    | 1.14 (0.88, 1.48)                                        | 1.10 (0.83, 1.45)                                   |
|                   | Males   | 1.00 (0.75, 1.35)                                         | 1.00 (0.78, 1.28)                                    | 0.87 (0.65, 1.16)                                        | 0.97 (0.75, 1.25)                                   |
| MEPA              | Females | 0.97 (0.85, 1.10)                                         | 0.99 (0.90, 1.09)                                    | 1.01 (0.91, 1.13)                                        | 0.94 (0.84, 1.06)                                   |
|                   | Males   | 1.00 (0.89, 1.13)                                         | 1.00 (0.92, 1.09)                                    | 0.98 (0.88, 1.10)                                        | 1.00 (0.91, 1.11)                                   |
| ETPA              | Females | 1.00 (0.89, 1.11)                                         | 1.00 (0.92, 1.08)                                    | 1.03 (0.93, 1.14)                                        | 1.03 (0.93, 1.14)                                   |
|                   | Males   | 0.98 (0.89, 1.09)                                         | 0.96 (0.88, 1.05)                                    | 1.00 (0.91, 1.10)                                        | 1.02 (0.93, 1.13)                                   |
| PRPA              | Females | 0.98 (0.88, 1.09)                                         | 1.01 (0.93, 1.09)                                    | 1.03 (0.94, 1.13)                                        | 0.96 (0.87, 1.06)                                   |
|                   | Males   | 1.02 (0.92, 1.14)                                         | 1.02 (0.94, 1.11)                                    | 1.01 (0.91, 1.11)                                        | 1.03 (0.93, 1.14)                                   |
| BPA               | Females | 1.03 (0.89, 1.18)                                         | 1.07 (0.96, 1.20)                                    | 1.06 (0.94, 1.20)                                        | 1.03 (0.89, 1.19)                                   |
|                   | Males   | 1.00 (0.86, 1.15)                                         | 0.99 (0.90, 1.09)                                    | 0.96 (0.85, 1.08)                                        | 0.98 (0.85, 1.13)                                   |
| BUPA              | Females | 1.02 (0.92, 1.14)                                         | 1.01 (0.94, 1.09)                                    | 1.05 (0.96, 1.14)                                        | 1.00 (0.91, 1.10)                                   |
|                   | Males   | 0.95 (0.87, 1.03)                                         | 0.99 (0.92, 1.06)                                    | 1.00 (0.92, 1.08)                                        | 0.98 (0.90, 1.06)                                   |
| BP-3              | Females | 1.03 (0.92, 1.15)                                         | 1.01 (0.94, 1.08)                                    | 1.00 (0.92, 1.09)                                        | 1.05 (0.97, 1.15)                                   |
|                   | Males   | 0.97 (0.89, 1.07)                                         | 0.99 (0.92, 1.07)                                    | 1.02 (0.94, 1.11)                                        | 1.04 (0.97, 1.12)                                   |
| TRCS <sup>a</sup> | Females | 1.07 (0.93, 1.23)                                         | 1.06 (0.96, 1.16)                                    | 1.03 (0.93, 1.15)                                        | 1.06 (0.96, 1.18)                                   |
|                   | Males   | 0.98 (0.88, 1.09)                                         | 0.99 (0.90, 1.08)                                    | 0.94 (0.85, 1.04)                                        | 0.96 (0.87, 1.08)                                   |
| HCB               | Females | 1.21 (0.96, 1.52)                                         | 1.08 (0.92, 1.27)                                    | <b>1.23 (1.01, 1.49)</b>                                 | 0.96 (0.81, 1.14)                                   |
|                   | Males   | 1.17 (0.96, 1.41)                                         | 1.05 (0.91, 1.20)                                    | <b>1.27 (1.06, 1.52)</b>                                 | 1.14 (0.96, 1.34)                                   |
| DDE               | Females | 1.09 (0.87, 1.36)                                         | 0.95 (0.81, 1.11)                                    | 1.08 (0.89, 1.30)                                        | 1.01 (0.84, 1.20)                                   |
|                   | Males   | <b>1.21 (1.01, 1.46)</b>                                  | 1.08 (0.93, 1.26)                                    | <b>1.30 (1.10, 1.54)</b>                                 | 1.03 (0.86, 1.22)                                   |

|                                                                                                                                                                                                                                                                                                                                                                                                                                                                                                                                                                                                                                                       |         |                   |                   |                          |                   |
|-------------------------------------------------------------------------------------------------------------------------------------------------------------------------------------------------------------------------------------------------------------------------------------------------------------------------------------------------------------------------------------------------------------------------------------------------------------------------------------------------------------------------------------------------------------------------------------------------------------------------------------------------------|---------|-------------------|-------------------|--------------------------|-------------------|
| PFHxS                                                                                                                                                                                                                                                                                                                                                                                                                                                                                                                                                                                                                                                 | Females | 0.75 (0.51, 1.11) | 0.94 (0.72, 1.23) | 1.29 (0.92, 1.82)        | 1.13 (0.81, 1.57) |
|                                                                                                                                                                                                                                                                                                                                                                                                                                                                                                                                                                                                                                                       | Males   | 0.76 (0.54, 1.06) | 0.86 (0.67, 1.09) | 1.02 (0.77, 1.35)        | 0.97 (0.73, 1.28) |
| PFOA                                                                                                                                                                                                                                                                                                                                                                                                                                                                                                                                                                                                                                                  | Females | 1.04 (0.69, 1.56) | 1.12 (0.85, 1.47) | 1.24 (0.87, 1.78)        | 1.21 (0.87, 1.68) |
|                                                                                                                                                                                                                                                                                                                                                                                                                                                                                                                                                                                                                                                       | Males   | 0.95 (0.68, 1.33) | 0.92 (0.70, 1.21) | 1.06 (0.78, 1.45)        | 0.91 (0.65, 1.26) |
| PFOS                                                                                                                                                                                                                                                                                                                                                                                                                                                                                                                                                                                                                                                  | Females | 0.85 (0.54, 1.34) | 1.07 (0.77, 1.49) | 1.26 (0.85, 1.88)        | 1.06 (0.75, 1.52) |
|                                                                                                                                                                                                                                                                                                                                                                                                                                                                                                                                                                                                                                                       | Males   | 0.97 (0.65, 1.44) | 0.97 (0.72, 1.31) | 1.24 (0.89, 1.72)        | 0.97 (0.70, 1.33) |
| PFNA                                                                                                                                                                                                                                                                                                                                                                                                                                                                                                                                                                                                                                                  | Females | 0.99 (0.67, 1.45) | 1.20 (0.89, 1.61) | 1.28 (0.91, 1.79)        | 1.27 (0.93, 1.74) |
|                                                                                                                                                                                                                                                                                                                                                                                                                                                                                                                                                                                                                                                       | Males   | 0.99 (0.69, 1.43) | 1.02 (0.78, 1.33) | 1.35 (0.99, 1.86)        | 0.92 (0.66, 1.27) |
| PCB 138                                                                                                                                                                                                                                                                                                                                                                                                                                                                                                                                                                                                                                               | Females | 1.18 (0.89, 1.55) | 1.08 (0.89, 1.33) | 1.26 (0.98, 1.61)        | 1.12 (0.88, 1.42) |
|                                                                                                                                                                                                                                                                                                                                                                                                                                                                                                                                                                                                                                                       | Males   | 0.98 (0.78, 1.24) | 1.03 (0.86, 1.23) | 1.21 (0.97, 1.50)        | 1.02 (0.83, 1.26) |
| PCB 153                                                                                                                                                                                                                                                                                                                                                                                                                                                                                                                                                                                                                                               | Females | 1.02 (0.76, 1.36) | 0.95 (0.77, 1.17) | 1.21 (0.93, 1.58)        | 0.98 (0.77, 1.24) |
|                                                                                                                                                                                                                                                                                                                                                                                                                                                                                                                                                                                                                                                       | Males   | 1.02 (0.82, 1.27) | 1.01 (0.86, 1.20) | <b>1.26 (1.00, 1.59)</b> | 1.03 (0.85, 1.25) |
| PCB 180                                                                                                                                                                                                                                                                                                                                                                                                                                                                                                                                                                                                                                               | Females | 1.00 (0.75, 1.32) | 1.03 (0.83, 1.27) | 1.18 (0.91, 1.53)        | 1.04 (0.82, 1.31) |
|                                                                                                                                                                                                                                                                                                                                                                                                                                                                                                                                                                                                                                                       | Males   | 0.98 (0.77, 1.25) | 1.04 (0.87, 1.26) | 1.21 (0.95, 1.54)        | 1.09 (0.87, 1.36) |
| <p>Reference outcome category is Class 4: average birth size and subsequent slower BMI gain (Females: N = 326 (53.7%) / Males: N = 281 (46.3%))</p> <p>Using imputed data (m=20)</p> <p>Abbreviations: BMI = body mass index, RRR = relative risk ratio, CI = confidence interval</p> <p><sup>a</sup> TRCS only included two cohorts (Sabadell, Valencia) as such sample size was smaller (n = 647 for females, n = 708 for males).</p> <p>All models adjusted for sub-cohort, social class, smoking during pregnancy, parity, maternal age at delivery, maternal prepregnancy BMI, paternal prepregnancy BMI, maternal Mediterranean diet score.</p> |         |                   |                   |                          |                   |

Table S9. Associations between EDCs and childhood BMI growth trajectory classes from single exposure models for the INMA birth cohort study by socioeconomic status, high (n = 613) / middle (n = 497) / low (n = 777)

|       |        | Class 1                                        | Class 2                                   | Class 3                                       | Class 5                                  |
|-------|--------|------------------------------------------------|-------------------------------------------|-----------------------------------------------|------------------------------------------|
| SES   |        | Higher birth size<br>– accelerated<br>BMI gain | Higher birth size<br>– slower<br>BMI gain | Lower birth size<br>– accelerated<br>BMI gain | Lower birth size<br>– slower<br>BMI gain |
|       | High   | N = 23.6%                                      | N = 31.7%                                 | N = 34.6%                                     | N = 34.3%                                |
|       | Middle | N = 28.5%                                      | N = 26.6%                                 | N = 23.8%                                     | N = 24.9%                                |
|       | Low    | N = 47.9%                                      | N = 41.7%                                 | N = 41.6%                                     | N = 40.8%                                |
| EDC   |        | RRR (95% CI)                                   | RRR (95% CI)                              | RRR (95% CI)                                  | RRR (95% CI)                             |
| MEP   | High   | 1.14 (0.89, 1.48)                              | 1.04 (0.89, 1.21)                         | 1.00 (0.83, 1.22)                             | 1.02 (0.83, 1.25)                        |
|       | Middle | 1.12 (0.89, 1.41)                              | 0.98 (0.81, 1.17)                         | 0.93 (0.75, 1.14)                             | 1.06 (0.86, 1.30)                        |
|       | Low    | 0.96 (0.77, 1.18)                              | 1.04 (0.89, 1.21)                         | 1.04 (0.87, 1.25)                             | 1.02 (0.85, 1.21)                        |
| MiBP  | High   | 0.92 (0.64, 1.33)                              | 0.91 (0.70, 1.18)                         | 0.87 (0.63, 1.19)                             | 0.97 (0.74, 1.27)                        |
|       | Middle | 1.23 (0.83, 1.82)                              | 1.07 (0.78, 1.47)                         | 1.14 (0.81, 1.61)                             | 1.07 (0.75, 1.53)                        |
|       | Low    | 1.04 (0.76, 1.43)                              | 1.09 (0.85, 1.40)                         | 0.95 (0.72, 1.25)                             | 0.94 (0.68, 1.30)                        |
| MnBP  | High   | 1.15 (0.84, 1.57)                              | 0.90 (0.72, 1.14)                         | 1.01 (0.78, 1.32)                             | 0.89 (0.69, 1.15)                        |
|       | Middle | 0.97 (0.71, 1.32)                              | 0.96 (0.76, 1.21)                         | 0.94 (0.72, 1.23)                             | 1.03 (0.76, 1.39)                        |
|       | Low    | 0.95 (0.76, 1.19)                              | 0.95 (0.79, 1.14)                         | 0.91 (0.74, 1.13)                             | 0.95 (0.75, 1.20)                        |
| MBzP  | High   | 1.10 (0.80, 1.52)                              | 1.01 (0.81, 1.25)                         | 1.17 (0.91, 1.51)                             | 0.97 (0.77, 1.23)                        |
|       | Middle | 0.92 (0.65, 1.30)                              | 1.09 (0.84, 1.40)                         | 1.12 (0.85, 1.48)                             | 0.93 (0.68, 1.26)                        |
|       | Low    | 1.09 (0.82, 1.44)                              | 1.05 (0.83, 1.32)                         | 1.06 (0.82, 1.39)                             | 1.09 (0.83, 1.42)                        |
| MEHP  | High   | 1.10 (0.78, 1.57)                              | 1.04 (0.83, 1.29)                         | 1.07 (0.84, 1.36)                             | 0.93 (0.72, 1.22)                        |
|       | Middle | 0.99 (0.70, 1.40)                              | 0.94 (0.73, 1.20)                         | 1.02 (0.74, 1.40)                             | 1.04 (0.77, 1.40)                        |
|       | Low    | 1.19 (0.88, 1.60)                              | 1.23 (0.97, 1.56)                         | 1.20 (0.91, 1.57)                             | <b>1.30 (1.01, 1.67)</b>                 |
| MEHHP | High   | 1.17 (0.84, 1.63)                              | 1.06 (0.85, 1.33)                         | 1.01 (0.78, 1.31)                             | 0.97 (0.75, 1.25)                        |
|       | Middle | 1.10 (0.76, 1.58)                              | 1.00 (0.77, 1.30)                         | 1.03 (0.73, 1.46)                             | 0.95 (0.68, 1.32)                        |
|       | Low    | 1.19 (0.88, 1.61)                              | <b>1.36 (1.03, 1.80)</b>                  | 1.24 (0.92, 1.67)                             | <b>1.35 (1.01, 1.80)</b>                 |
| MEOHP | High   | 1.17 (0.84, 1.63)                              | 1.06 (0.85, 1.33)                         | 1.00 (0.78, 1.29)                             | 0.92 (0.71, 1.19)                        |
|       | Middle | 1.06 (0.73, 1.54)                              | 0.98 (0.75, 1.28)                         | 1.01 (0.72, 1.43)                             | 0.95 (0.68, 1.33)                        |
|       | Low    | 1.24 (0.91, 1.68)                              | <b>1.37 (1.03, 1.81)</b>                  | 1.28 (0.95, 1.72)                             | <b>1.35 (1.02, 1.80)</b>                 |
| MECPP | High   | 1.12 (0.79, 1.60)                              | 0.99 (0.77, 1.27)                         | 0.90 (0.68, 1.20)                             | 0.91 (0.69, 1.22)                        |
|       | Middle | 0.98 (0.64, 1.51)                              | 0.96 (0.71, 1.30)                         | 1.00 (0.68, 1.45)                             | 0.97 (0.66, 1.41)                        |
|       | Low    | 1.15 (0.80, 1.66)                              | 1.29 (0.94, 1.78)                         | 1.17 (0.82, 1.66)                             | 1.27 (0.93, 1.73)                        |
| MEPA  | High   | 0.96 (0.82, 1.13)                              | 0.96 (0.86, 1.08)                         | 0.92 (0.81, 1.04)                             | 0.92 (0.80, 1.05)                        |
|       | Middle | 0.99 (0.84, 1.15)                              | 1.04 (0.92, 1.17)                         | 0.96 (0.83, 1.11)                             | 0.99 (0.84, 1.16)                        |
|       | Low    | 1.01 (0.88, 1.16)                              | 1.01 (0.91, 1.13)                         | 1.10 (0.98, 1.23)                             | 1.02 (0.90, 1.16)                        |
| ETPA  | High   | 0.99 (0.84, 1.16)                              | 0.96 (0.86, 1.08)                         | 0.97 (0.86, 1.09)                             | 1.00 (0.87, 1.14)                        |
|       | Middle | 0.99 (0.86, 1.15)                              | 0.98 (0.88, 1.09)                         | 0.99 (0.87, 1.13)                             | 1.02 (0.88, 1.18)                        |
|       | Low    | 1.01 (0.90, 1.12)                              | 1.00 (0.91, 1.09)                         | 1.07 (0.96, 1.20)                             | 1.06 (0.95, 1.18)                        |
| PRPA  | High   | 0.98 (0.85, 1.13)                              | 0.98 (0.89, 1.09)                         | 0.95 (0.85, 1.05)                             | 0.96 (0.86, 1.08)                        |
|       | Middle | 0.98 (0.85, 1.14)                              | 1.02 (0.91, 1.14)                         | 0.99 (0.87, 1.13)                             | 1.00 (0.86, 1.16)                        |
|       | Low    | 1.04 (0.93, 1.16)                              | 1.04 (0.95, 1.14)                         | 1.10 (0.99, 1.23)                             | 1.02 (0.92, 1.14)                        |

|                                                                                                                                           |        |                          |                   |                          |                   |
|-------------------------------------------------------------------------------------------------------------------------------------------|--------|--------------------------|-------------------|--------------------------|-------------------|
| BPA                                                                                                                                       | High   | 0.98 (0.83, 1.15)        | 1.06 (0.95, 1.19) | 1.06 (0.92, 1.21)        | 1.01 (0.87, 1.18) |
|                                                                                                                                           | Middle | 0.99 (0.81, 1.21)        | 1.01 (0.88, 1.17) | 1.04 (0.87, 1.25)        | 0.93 (0.77, 1.13) |
|                                                                                                                                           | Low    | 1.06 (0.90, 1.25)        | 1.02 (0.89, 1.16) | 0.96 (0.82, 1.12)        | 1.06 (0.89, 1.26) |
| BUPA                                                                                                                                      | High   | 0.98 (0.84, 1.13)        | 1.00 (0.90, 1.11) | 1.00 (0.90, 1.12)        | 0.95 (0.85, 1.06) |
|                                                                                                                                           | Middle | 0.98 (0.87, 1.11)        | 1.00 (0.91, 1.10) | 0.98 (0.87, 1.10)        | 1.02 (0.90, 1.16) |
|                                                                                                                                           | Low    | 0.99 (0.90, 1.09)        | 1.01 (0.93, 1.09) | 1.06 (0.97, 1.16)        | 1.00 (0.91, 1.10) |
| BP-3                                                                                                                                      | High   | 1.02 (0.90, 1.16)        | 0.99 (0.90, 1.08) | 1.00 (0.90, 1.10)        | 1.03 (0.94, 1.14) |
|                                                                                                                                           | Middle | 0.94 (0.83, 1.05)        | 1.00 (0.92, 1.08) | 0.99 (0.88, 1.11)        | 1.03 (0.93, 1.15) |
|                                                                                                                                           | Low    | 1.04 (0.93, 1.16)        | 1.03 (0.93, 1.12) | 1.05 (0.96, 1.16)        | 1.08 (0.98, 1.20) |
| TRCS <sup>a</sup>                                                                                                                         | High   | 1.16 (0.96, 1.41)        | 1.05 (0.92, 1.18) | 1.03 (0.90, 1.18)        | 1.03 (0.90, 1.16) |
|                                                                                                                                           | Middle | 0.96 (0.83, 1.12)        | 1.02 (0.90, 1.15) | 1.00 (0.86, 1.17)        | 1.06 (0.89, 1.26) |
|                                                                                                                                           | Low    | 1.00 (0.88, 1.12)        | 1.01 (0.92, 1.11) | 0.94 (0.85, 1.05)        | 0.98 (0.88, 1.10) |
| HCB                                                                                                                                       | High   | 1.26 (0.91, 1.74)        | 1.06 (0.87, 1.30) | 1.15 (0.90, 1.45)        | 1.22 (0.97, 1.53) |
|                                                                                                                                           | Middle | <b>1.52 (1.08, 2.15)</b> | 1.21 (0.98, 1.51) | <b>1.53 (1.13, 2.07)</b> | 1.13 (0.88, 1.44) |
|                                                                                                                                           | Low    | 1.00 (0.82, 1.22)        | 0.99 (0.85, 1.15) | 1.18 (0.97, 1.43)        | 0.93 (0.78, 1.12) |
| DDE                                                                                                                                       | High   | 0.95 (0.70, 1.29)        | 1.08 (0.88, 1.33) | <b>1.39 (1.07, 1.80)</b> | 1.16 (0.92, 1.47) |
|                                                                                                                                           | Middle | 1.11 (0.82, 1.49)        | 0.92 (0.73, 1.16) | 1.11 (0.85, 1.44)        | 0.84 (0.63, 1.12) |
|                                                                                                                                           | Low    | <b>1.23 (1.03, 1.48)</b> | 1.00 (0.85, 1.17) | 1.13 (0.94, 1.35)        | 1.01 (0.85, 1.20) |
| PFHxS                                                                                                                                     | High   | 0.84 (0.53, 1.35)        | 0.94 (0.67, 1.31) | 1.17 (0.80, 1.70)        | 0.96 (0.67, 1.38) |
|                                                                                                                                           | Middle | 0.78 (0.45, 1.37)        | 0.85 (0.59, 1.23) | 0.95 (0.61, 1.49)        | 0.98 (0.60, 1.62) |
|                                                                                                                                           | Low    | 0.71 (0.50, 1.01)        | 0.93 (0.70, 1.23) | 1.28 (0.93, 1.76)        | 1.17 (0.84, 1.63) |
| PFOA                                                                                                                                      | High   | 1.27 (0.75, 2.14)        | 1.03 (0.72, 1.47) | 1.14 (0.73, 1.78)        | 1.07 (0.74, 1.54) |
|                                                                                                                                           | Middle | 0.99 (0.58, 1.69)        | 1.12 (0.77, 1.63) | 1.12 (0.69, 1.83)        | 0.90 (0.53, 1.51) |
|                                                                                                                                           | Low    | 0.90 (0.59, 1.36)        | 0.98 (0.72, 1.33) | 1.21 (0.87, 1.69)        | 1.15 (0.81, 1.62) |
| PFOS                                                                                                                                      | High   | 1.03 (0.58, 1.81)        | 1.25 (0.87, 1.79) | 1.31 (0.82, 2.07)        | 0.97 (0.65, 1.45) |
|                                                                                                                                           | Middle | 0.91 (0.53, 1.57)        | 1.01 (0.67, 1.53) | 0.99 (0.60, 1.61)        | 0.92 (0.55, 1.56) |
|                                                                                                                                           | Low    | 0.86 (0.57, 1.30)        | 0.92 (0.66, 1.28) | 1.37 (0.95, 1.98)        | 1.16 (0.80, 1.66) |
| PFNA                                                                                                                                      | High   | 0.91 (0.57, 1.46)        | 1.12 (0.79, 1.59) | 1.13 (0.72, 1.78)        | 1.00 (0.71, 1.41) |
|                                                                                                                                           | Middle | 0.95 (0.58, 1.55)        | 1.04 (0.70, 1.54) | 1.35 (0.84, 2.17)        | 0.94 (0.57, 1.55) |
|                                                                                                                                           | Low    | 1.10 (0.72, 1.69)        | 1.18 (0.87, 1.60) | <b>1.49 (1.07, 2.07)</b> | 1.26 (0.89, 1.79) |
| PCB 138                                                                                                                                   | High   | 1.18 (0.81, 1.71)        | 1.12 (0.88, 1.42) | <b>1.39 (1.02, 1.89)</b> | 1.17 (0.89, 1.54) |
|                                                                                                                                           | Middle | 1.20 (0.82, 1.74)        | 1.06 (0.80, 1.41) | 1.15 (0.81, 1.64)        | 1.00 (0.72, 1.39) |
|                                                                                                                                           | Low    | 0.94 (0.73, 1.20)        | 1.01 (0.83, 1.23) | 1.18 (0.93, 1.51)        | 1.04 (0.82, 1.31) |
| PCB 153                                                                                                                                   | High   | 1.22 (0.78, 1.89)        | 1.07 (0.82, 1.40) | <b>1.48 (1.02, 2.14)</b> | 1.00 (0.77, 1.30) |
|                                                                                                                                           | Middle | 1.27 (0.82, 1.98)        | 0.99 (0.75, 1.33) | 1.09 (0.77, 1.56)        | 0.98 (0.70, 1.37) |
|                                                                                                                                           | Low    | 0.87 (0.70, 1.09)        | 0.95 (0.80, 1.13) | 1.21 (0.94, 1.55)        | 1.05 (0.84, 1.31) |
| PCB 180                                                                                                                                   | High   | 1.33 (0.84, 2.10)        | 1.11 (0.84, 1.46) | 1.35 (0.95, 1.92)        | 0.98 (0.75, 1.29) |
|                                                                                                                                           | Middle | 1.19 (0.75, 1.88)        | 1.02 (0.77, 1.37) | 1.10 (0.75, 1.61)        | 1.16 (0.79, 1.70) |
|                                                                                                                                           | Low    | 0.83 (0.65, 1.05)        | 1.00 (0.83, 1.22) | 1.15 (0.90, 1.48)        | 1.11 (0.87, 1.41) |
| Reference outcome category is Class 4: average birth size and subsequent slower BMI gain (High: N = 34.6% / Middle: N = 27% / Low: 38.4%) |        |                          |                   |                          |                   |
| Using imputed data (m=20)                                                                                                                 |        |                          |                   |                          |                   |
| Abbreviations: BMI = body mass index, RRR = relative risk ratio, CI = confidence interval                                                 |        |                          |                   |                          |                   |

<sup>a</sup> TRCS only included two cohorts (Sabadell, Valencia) as such sample size was smaller (n = 375 for High, n = 374 for middle, n = 606 for lower).

All models adjusted for sub-cohort, smoking during pregnancy, parity, maternal age at delivery, maternal prepregnancy BMI, paternal prepregnancy BMI, maternal Mediterranean diet score, child sex.

**Bold text indicates significant result.**

Table S10. Associations between EDC mixture and childhood BMI trajectories from mixture models using BWQS regression (n = 1,911), for the INMA birth cohort study.

|                         | Class 1<br>Higher birth size –<br>accelerated BMI gain |              |              | Class 2<br>Higher birth size –<br>slower BMI gain |              |              | Class 3<br>Lower birth size –<br>slower BMI gain |              |              | Class 5<br>Lower birth size –<br>slower BMI gain |              |              |
|-------------------------|--------------------------------------------------------|--------------|--------------|---------------------------------------------------|--------------|--------------|--------------------------------------------------|--------------|--------------|--------------------------------------------------|--------------|--------------|
|                         | OR                                                     | lower<br>CrI | upper<br>CrI | OR                                                | lower<br>CrI | upper<br>CrI | OR                                               | lower<br>CrI | upper<br>CrI | OR                                               | lower<br>CrI | upper<br>CrI |
| OR<br>(BWQS<br>index)   | 1.15                                                   | 0.68         | 1.97         | 1.16                                              | 0.86         | 1.59         | 1.71                                             | 1.03         | 2.60         | 1.24                                             | 0.82         | 1.87         |
| Chemical<br>weight for: |                                                        |              |              |                                                   |              |              |                                                  |              |              |                                                  |              |              |
| MEP                     | 0.048                                                  | 0.001        | 0.169        | 0.044                                             | 0.001        | 0.152        | 0.030                                            | 0.001        | 0.106        | 0.051                                            | 0.001        | 0.182        |
| MiBP                    | 0.039                                                  | 0.001        | 0.136        | 0.041                                             | 0.001        | 0.144        | 0.022                                            | 0.001        | 0.084        | 0.039                                            | 0.001        | 0.140        |
| MnBP                    | 0.046                                                  | 0.001        | 0.162        | 0.042                                             | 0.001        | 0.152        | 0.028                                            | 0.001        | 0.097        | 0.039                                            | 0.001        | 0.139        |
| MBzP                    | 0.041                                                  | 0.001        | 0.137        | 0.042                                             | 0.001        | 0.142        | 0.029                                            | 0.001        | 0.101        | 0.034                                            | 0.001        | 0.127        |
| MEHP                    | 0.044                                                  | 0.001        | 0.151        | 0.042                                             | 0.001        | 0.154        | 0.037                                            | 0.001        | 0.128        | 0.039                                            | 0.001        | 0.146        |
| MEHHP                   | 0.042                                                  | 0.001        | 0.157        | 0.045                                             | 0.001        | 0.154        | 0.031                                            | 0.001        | 0.112        | 0.038                                            | 0.001        | 0.141        |
| MEOHP                   | 0.040                                                  | 0.001        | 0.146        | 0.041                                             | 0.001        | 0.147        | 0.026                                            | 0.001        | 0.101        | 0.036                                            | 0.001        | 0.128        |
| MECPP                   | 0.039                                                  | 0.001        | 0.144        | 0.040                                             | 0.001        | 0.146        | 0.029                                            | 0.001        | 0.101        | 0.039                                            | 0.001        | 0.128        |
| MEPA                    | 0.039                                                  | 0.001        | 0.141        | 0.043                                             | 0.001        | 0.150        | 0.027                                            | 0.001        | 0.099        | 0.041                                            | 0.001        | 0.145        |
| ETPA                    | 0.039                                                  | 0.001        | 0.155        | 0.038                                             | 0.001        | 0.135        | 0.026                                            | 0.001        | 0.092        | 0.042                                            | 0.001        | 0.152        |
| PRPA                    | 0.041                                                  | 0.001        | 0.147        | 0.048                                             | 0.001        | 0.163        | 0.032                                            | 0.001        | 0.115        | 0.044                                            | 0.001        | 0.151        |
| BPA                     | 0.045                                                  | 0.001        | 0.163        | 0.049                                             | 0.002        | 0.170        | 0.043                                            | 0.001        | 0.140        | 0.047                                            | 0.001        | 0.163        |
| BUPA                    | 0.040                                                  | 0.001        | 0.139        | 0.039                                             | 0.001        | 0.140        | 0.029                                            | 0.001        | 0.099        | 0.039                                            | 0.001        | 0.143        |
| BP-3                    | 0.050                                                  | 0.001        | 0.179        | 0.046                                             | 0.001        | 0.157        | 0.051                                            | 0.002        | 0.161        | 0.066                                            | 0.002        | 0.215        |
| HCB                     | 0.059                                                  | 0.002        | 0.212        | 0.052                                             | 0.002        | 0.172        | 0.108                                            | 0.004        | 0.283        | 0.044                                            | 0.001        | 0.158        |
| DDE                     | 0.055                                                  | 0.002        | 0.197        | 0.048                                             | 0.002        | 0.168        | 0.094                                            | 0.002        | 0.261        | 0.055                                            | 0.002        | 0.187        |
| PFHxS                   | 0.039                                                  | 0.001        | 0.156        | 0.037                                             | 0.001        | 0.137        | 0.040                                            | 0.001        | 0.132        | 0.042                                            | 0.001        | 0.143        |
| PFOA                    | 0.040                                                  | 0.001        | 0.147        | 0.039                                             | 0.001        | 0.144        | 0.034                                            | 0.001        | 0.125        | 0.042                                            | 0.001        | 0.149        |
| PFOS                    | 0.039                                                  | 0.001        | 0.150        | 0.039                                             | 0.001        | 0.142        | 0.047                                            | 0.001        | 0.161        | 0.045                                            | 0.001        | 0.150        |
| PFNA                    | 0.039                                                  | 0.001        | 0.139        | 0.045                                             | 0.001        | 0.158        | 0.043                                            | 0.001        | 0.134        | 0.050                                            | 0.001        | 0.177        |
| PCB 138                 | 0.045                                                  | 0.001        | 0.156        | 0.048                                             | 0.001        | 0.171        | 0.075                                            | 0.003        | 0.235        | 0.043                                            | 0.001        | 0.148        |
| PCB 153                 | 0.045                                                  | 0.001        | 0.157        | 0.045                                             | 0.001        | 0.158        | 0.063                                            | 0.002        | 0.197        | 0.042                                            | 0.001        | 0.146        |
| PCB 180                 | 0.046                                                  | 0.001        | 0.165        | 0.047                                             | 0.001        | 0.168        | 0.058                                            | 0.002        | 0.192        | 0.045                                            | 0.001        | 0.157        |

Reference outcome category is Class 4: average birth size and subsequent slower BMI gain

Abbreviations: BMI = body mass index, OR = odds ratio, CrI = credible interval

All models adjusted for sub-cohort, smoking during pregnancy, parity, maternal age at delivery, maternal prepregnancy BMI, paternal prepregnancy BMI, maternal Mediterranean diet score, social class, child sex.

Table S11. Class-specific mean predicted trajectory values and their confidence intervals for each BMI trajectory class depicted in Figure 1, by select age groups.

| Age     | Class 1           | Class 2           | Class 3              | Class 4              | Class 5              |
|---------|-------------------|-------------------|----------------------|----------------------|----------------------|
| 6 mo.   | 0.61 (0.56, 0.66) | 0.34 (0.30, 0.39) | -0.66 (-0.71, -0.60) | -0.41 (-0.46, -0.36) | -1.31 (-1.36, -1.25) |
| 1 year  | 1.14 (1.10, 1.18) | 0.60 (0.57, 0.64) | -0.19 (-0.24, -0.15) | -0.19 (-0.24, -0.15) | -1.11 (-1.15, -1.07) |
| 2 years | 1.57 (1.53, 1.62) | 0.80 (0.76, 0.84) | 0.22 (0.17, 0.27)    | -0.03 (-0.07, 0.02)  | -0.94 (-0.99, -0.90) |
| 3 years | 2.17 (2.11, 2.23) | 1.02 (0.97, 1.08) | 0.87 (0.80, 0.93)    | 0.18 (0.13, 0.23)    | -0.71 (-0.77, -0.65) |
| 5 years | 2.48 (2.41, 2.54) | 1.07 (1.01, 1.13) | 1.33 (1.26, 1.39)    | 0.24 (0.20, 0.29)    | -0.57 (-0.63, -0.50) |
| 7 years | 2.47 (2.40, 2.55) | 0.85 (0.78, 0.92) | 1.80 (1.73, 1.87)    | 0.12 (0.07, 0.17)    | -0.49 (-0.56, -0.42) |
| 9 years | 2.11 (2.02, 2.21) | 0.57 (0.48, 0.65) | 1.90 (1.82, 1.98)    | -0.07 (-0.13, -0.01) | -0.49 (-0.57, -0.41) |

The “class-specific mean predicted trajectory” values are generated by the model function. The values are representative of the mean zbmi predicted at a chosen age point for each trajectory. These values are estimated through simulations, in our case we used 50,000 simulations. Class 1: higher birth size – accelerated BMI gain (N=212, 11.1%). Class 2: higher birth size – slower BMI gain (N=513, 26.8%). Class 3: lower birth size – accelerated BMI gain (N=292, 15.3%). Class 4: average birth size – slower BMI gain (N=607, 31.8%) (reference). Class 5: lower birth size – slower BMI gain (N=287, 15.0%).



Figure S1. Directed acyclic graph of the association between prenatal exposure to EDCs and zBMI growth trajectories.

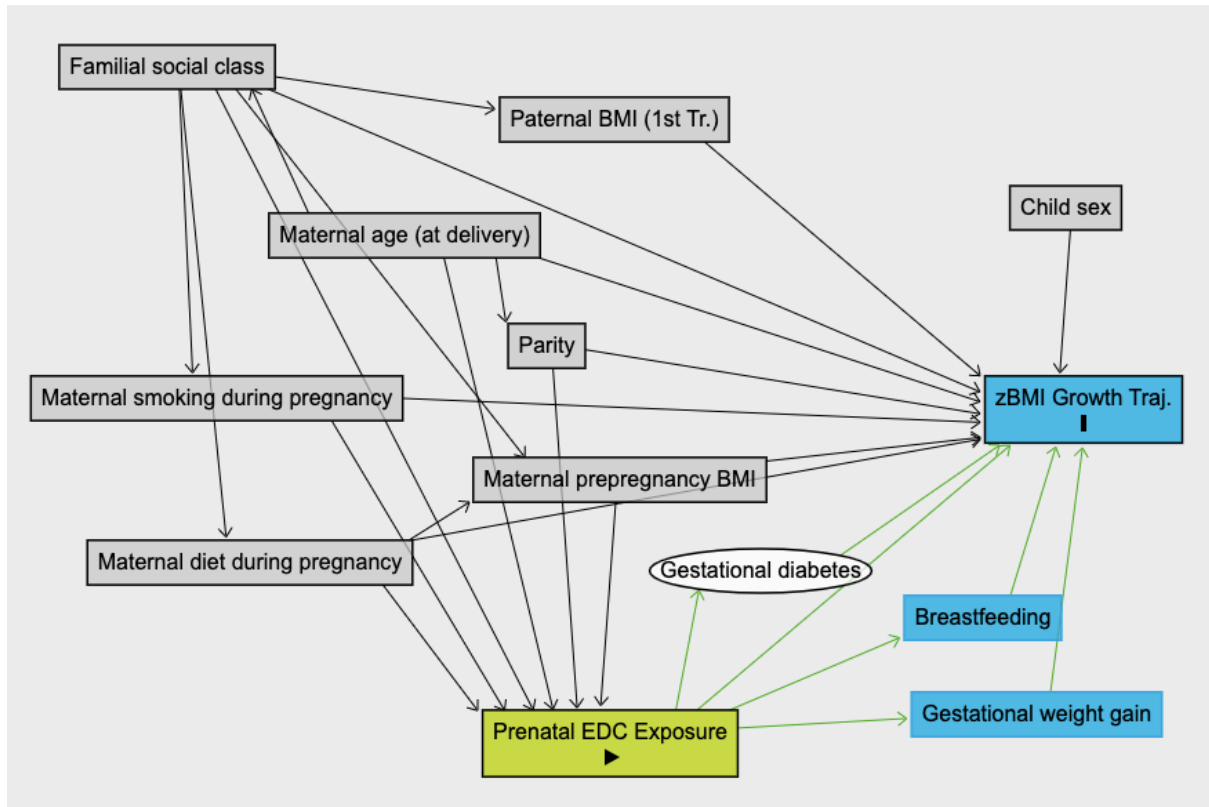

Abbreviations: BMI, body mass index; EDCs, endocrine disrupting chemicals; Traj., trajectories; Tr., trimester.

Blue nodes: Variables associated to growth trajectories. Grey nodes: variables associated to both exposure and outcomes (confounders), with the exception of child sex. White nodes: variables unaccounted.

Including only those variables with the grey nodes, the model is considered to be sufficiently adjusted for the estimation of the total effect.

DAG created using Daggity<sup>1</sup>

1. Textor J, van der Zander B, Gilthorpe MS, Liškiewicz M, Ellison GT (2016). "Robust causal inference using directed acyclic graphs: the R package 'dagitty'." *International Journal of Epidemiology*, 45(6), 1887–1894. [doi:10.1093/ije/dyw341](https://doi.org/10.1093/ije/dyw341).

Figures S2-3. Pairwise Correlations of EDC exposures for the INMA birth cohort study

S2) Imputed data set, n = 1,911

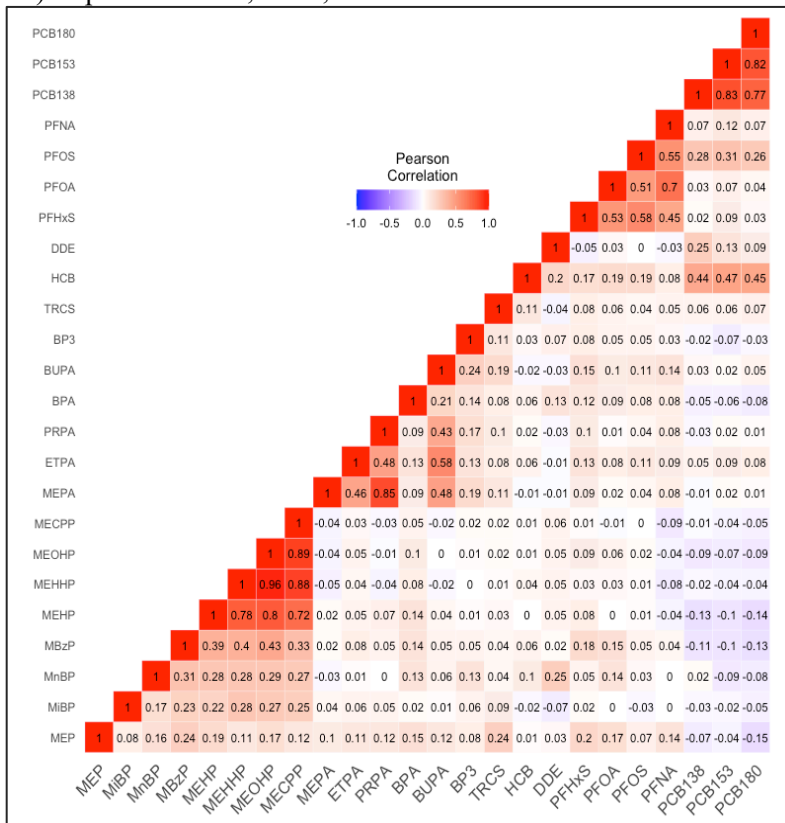

S3) Unimputed data set, complete case

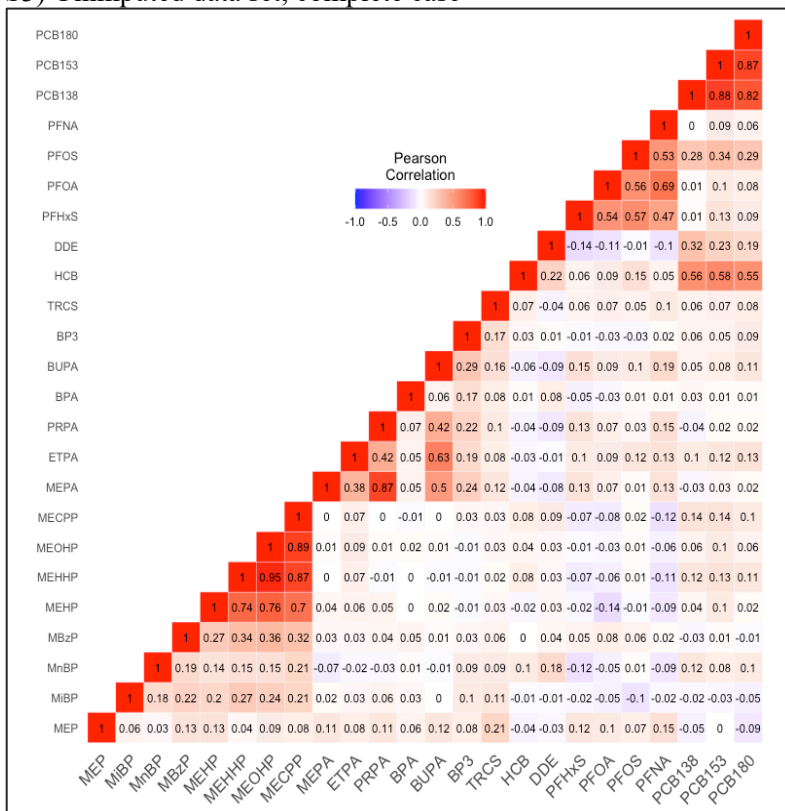

Supplement: ehp11103.s001.acco.pdf [file ehp11103.s001.acco.pdf]
