# Supplementary material
Source: PubMed Central journal article supplement (PMC10583704)
Supplement: ehp11103.smcontents.508.pdf [file ehp11103.smcontents.508.pdf]

**Note to readers with disabilities:** *EHP* strives to ensure that all journal content is accessible to all readers. However, some figures and Supplemental Material published in *EHP* articles may not conform to [508 standards](#) due to the complexity of the information being presented. If you need assistance accessing journal content, please contact [ehp508@niehs.nih.gov](mailto:ehp508@niehs.nih.gov). Our staff will work with you to assess and meet your accessibility needs within 3 working days.

### **Supplemental Material**

#### **Prenatal Exposure to Multiple Endocrine-Disrupting Chemicals and Childhood BMI Trajectories in the INMA Cohort Study**

Parisa Montazeri, Nuria Güil-Oumrait, Sandra Marquez, Lourdes Cirugeda, Andrea Beneito, Mònica Guxens, Aitana Lertxundi, Maria-Jose Lopez-Espinosa, Loreto Santa-Marina, Jordi Sunyer, Maribel Casas, and Martine Vrijheid

#### **Table of Contents**

**Table S1.** Details regarding laboratories and LOD or LOQ by sampling period for Gipuzkoa subcohort of the INMA birth cohort study.

**Table S2.** Details regarding laboratories and LOD or LOQ by sampling period for Sabadell subcohort of the INMA birth cohort study.

**Table S3.** Details regarding laboratories and LOD or LOQ by sampling period for Valencia subcohort of the INMA birth cohort study.

**Table S4.** Description of the growth trajectory modeling used in the INMA birth cohort study.

**Table S5.** Characteristics of the study population, unimputed and imputed data for the INMA birth cohort study.

**Table S6.** Associations between EDCs and childhood BMI trajectories from single exposure models using multinomial regression models and expressed as relative risk ratios, for the INMA birth cohort study.

**Table S7.** Associations between EDCs and childhood BMI trajectories from single exposure models using multinomial regression models and expressed as relative risk ratios for the INMA birth cohort study, complete case analysis.

**Table S8.** Associations between EDCs and childhood BMI trajectories from single exposure models using multinomial regression models and expressed as relative risk ratios for the INMA birth cohort study, by sex [females (n = 927) / males (n = 984)].

**Table S9.** Associations between EDCs and childhood BMI growth trajectory classes from single exposure models for the INMA birth cohort study by socioeconomic status, high (n = 613) / middle (n = 497) / low (n = 777).

**Table S10.** Associations between EDC mixture and childhood BMI trajectories from mixture models using BWQS regression (n = 1,911), for the INMA birth cohort study.

**Table S11.** Class-specific mean predicted trajectory values and their confidence intervals for each BMI trajectory class depicted in Figure 1, by select age groups.

**Figure S1.** Directed acyclic graph of the association between prenatal exposure to EDCs and zBMI growth trajectories.

**Figure S2-3.** Pairwise Correlations of EDC exposures for the INMA birth cohort study.
